# Supplementary material for: Copper(i) coordination polymers and mononuclear copper(i) complexes built from poly(1,2,4-triazolyl)borate ligands and tri-organophosphinesElectronic supplementary information available: conductivity data for compounds 1–14. See http://www.rsc.org/suppdata/dt/b2/b200200k/
Source: Royal Society of Chemistry journal article supplement (doi:10.1039/b200200k), 2002-04-24
Supplement: b200200k.pdf [file b200200k.pdf]

## Conductivity data for compounds 1-14

1.  $\Lambda_m(\text{CH}_2\text{Cl}_2, 0.01\text{M}): 0.1 \Omega^{-1}\text{mol}^2\text{cm}^{-1}$ .  $\Lambda_m(\text{Acetone}, 0.01\text{M}): 2.8 \Omega^{-1}\text{mol}^2\text{cm}^{-1}$ .
2.  $\Lambda_m(\text{CH}_2\text{Cl}_2, 0.01\text{M}): 0.02 \Omega^{-1}\text{mol}^2\text{cm}^{-1}$ .  $\Lambda_m(\text{Acetone}, 0.01\text{M}): 3.4 \Omega^{-1}\text{mol}^2\text{cm}^{-1}$ .
3.  $\Lambda_m(\text{CH}_2\text{Cl}_2, 0.01\text{M}): 0.5 \Omega^{-1}\text{mol}^2\text{cm}^{-1}$ .  $\Lambda_m(\text{Acetone}, 0.01\text{M}): 3.5 \Omega^{-1}\text{mol}^2\text{cm}^{-1}$ .
4.  $\Lambda_m(\text{CH}_2\text{Cl}_2, 0.01\text{M}): 0.0 \Omega^{-1}\text{mol}^2\text{cm}^{-1}$ .  $\Lambda_m(\text{Acetone}, 0.011\text{M}): 2.5 \Omega^{-1}\text{mol}^2\text{cm}^{-1}$ .
5.  $\Lambda_m(\text{CH}_2\text{Cl}_2, 0.01\text{M}): 0.01 \Omega^{-1}\text{mol}^2\text{cm}^{-1}$ .  $\Lambda_m(\text{Acetone}, 0.011\text{M}): 6.5 \Omega^{-1}\text{mol}^2\text{cm}^{-1}$ .
6.  $\Lambda_m(\text{CH}_2\text{Cl}_2, 0.01\text{M}): 0.03 \Omega^{-1}\text{mol}^2\text{cm}^{-1}$ .  $\Lambda_m(\text{Acetone}, 0.01\text{M}): 0.9 \Omega^{-1}\text{mol}^2\text{cm}^{-1}$ .
7.  $\Lambda_m(\text{CH}_2\text{Cl}_2, 0.01\text{M}): 0.09 \Omega^{-1}\text{mol}^2\text{cm}^{-1}$ .  $\Lambda_m(\text{Acetone}, 0.01\text{M}): 2.1 \Omega^{-1}\text{mol}^2\text{cm}^{-1}$ .
8.  $\Lambda_m(\text{CH}_2\text{Cl}_2, 0.01\text{M}): 0.02 \Omega^{-1}\text{mol}^2\text{cm}^{-1}$ .  $\Lambda_m(\text{Acetone}, 0.01\text{M}): 2.9 \Omega^{-1}\text{mol}^2\text{cm}^{-1}$ .
9.  $\Lambda_m(\text{CH}_2\text{Cl}_2, 0.01\text{M}): 0.1 \Omega^{-1}\text{mol}^2\text{cm}^{-1}$ .  $\Lambda_m(\text{Acetone}, 0.01\text{M}): 3.3 \Omega^{-1}\text{mol}^2\text{cm}^{-1}$ .
10.  $\Lambda_m(\text{CH}_2\text{Cl}_2, 0.01\text{M}): 0.4 \Omega^{-1}\text{mol}^2\text{cm}^{-1}$ .  $\Lambda_m(\text{Acetone}, 0.01\text{M}): 4.5 \Omega^{-1}\text{mol}^2\text{cm}^{-1}$ .
11.  $\Lambda_m(\text{CH}_2\text{Cl}_2, 0.01\text{M}): 0.01 \Omega^{-1}\text{mol}^2\text{cm}^{-1}$ .  $\Lambda_m(\text{Acetone}, 0.011\text{M}): 1.5 \Omega^{-1}\text{mol}^2\text{cm}^{-1}$ .
12.  $\Lambda_m(\text{CH}_2\text{Cl}_2, 0.01\text{M}): 0.01 \Omega^{-1}\text{mol}^2\text{cm}^{-1}$ .  $\Lambda_m(\text{Acetone}, 0.011\text{M}): 0.5 \Omega^{-1}\text{mol}^2\text{cm}^{-1}$ .
13.  $\Lambda_m(\text{CH}_2\text{Cl}_2, 0.01\text{M}): 0.02 \Omega^{-1}\text{mol}^2\text{cm}^{-1}$ .  $\Lambda_m(\text{Acetone}, 0.01\text{M}): 0.9 \Omega^{-1}\text{mol}^2\text{cm}^{-1}$ .
14.  $\Lambda_m(\text{CH}_2\text{Cl}_2, 0.01\text{M}): 0.5 \Omega^{-1}\text{mol}^2\text{cm}^{-1}$ .  $\Lambda_m(\text{Acetone}, 0.01\text{M}): 1.1 \Omega^{-1}\text{mol}^2\text{cm}^{-1}$ .
